# Supplementary material
Source: HighWire-hosted journal article supplement (https://www.ajnr.org/highwire/filestream/90298/field_highwire_adjunct_files/0/1157.pdf)
Supplement: 1157.pdf [file 1157.pdf]

| No | Age, Gender | Type of Cancer          | Painful area    | Pain duration (months) | 1 month NRS change | 1 month BPI severity change | POD1 Contra-lateral pain | 1 Month Contra-lateral pain | Lesion/cord volume %, T <sub>2</sub> WI | Lesion/cord volume %, DWI | MD (*10 <sup>-3</sup> mm <sup>2</sup> /sec) | FA (a.u.) |
|----|-------------|-------------------------|-----------------|------------------------|--------------------|-----------------------------|--------------------------|-----------------------------|-----------------------------------------|---------------------------|---------------------------------------------|-----------|
| 1  | F, 46       | CRC                     | Lt leg          | 24                     | -7                 | 3                           | Yes                      | Yes                         | 19                                      | 10                        | 0.750                                       | 0.357     |
| 2  | F, 51       | Cholangio-carcinoma     | Rt pelvis + leg | 12                     | -10                |                             | No                       | Yes                         | 20                                      | 29                        | 0.867                                       | 0.426     |
| 3  | M, 80       | Lung mesothelioma       | Rt chest        | 24                     | -8                 | -6                          | Yes                      | Yes                         | 11                                      | 25                        | 0.933                                       | 0.451     |
| 4  | F, 67       | NSCLC                   | Rt Shoulder     | 6                      | 0                  |                             | No                       | No                          | 39                                      | 28                        | 1.133                                       | 0.400     |
| 5  | M, 66       | NSCLC                   | Lt upper limb   | 6                      | N/A                |                             | No                       | N/A                         | 28                                      | 30                        | 1.469                                       | 0.367     |
| 6  | M, 72       | Chordoma                | Lt pelvis + leg | 18                     | -9                 | 8                           | Yes                      | Yes                         | 13                                      | 20                        | 0.673                                       | 0.499     |
| 7  | M, 74       | TCC                     | Rt pelvis +leg  | 11                     | -8                 | -22                         | No                       | Yes                         | 17                                      | 6                         | 0.829                                       | 0.538     |
| 8  | F, 71       | SCC mouth               | Lt back+hip     | 12                     | -8                 |                             | Yes                      | Yes                         | 10                                      | 9                         | 0.839                                       | 0.368     |
| 9  | M, 72       | NSCLC, Prostate Ca, TCC | Rt pelvis       | 4                      | -8                 |                             | No                       | Yes                         | 13                                      | 12                        | 0.905                                       | 0.476     |
| 10 | F, 61       | Papillary thyroid Ca    | Lt upper limb   | 4                      | -10                | -15                         | Yes                      | Yes                         | 17                                      | 15                        | 0.994                                       | 0.370     |
| 11 | M, 62       | NSCLC                   | Rt hip          | 6                      | -8                 | -10                         | Yes                      | Yes                         | 35                                      | 8                         | 0.826                                       | 0.335     |
| 12 | M, 72       | TCC                     | Rt back +leg    | 6                      | -10                | -100                        | No                       | No                          | 20                                      | 8                         | 0.950                                       | 0.446     |
| 13 | F, 68       | Endometrial Ca          | Lt pelvis+leg   | 4                      | -8                 | -56                         | No                       | No                          | 21                                      | 12                        | 1.323                                       | 0.291     |

|    |       |             |                  |   |     |      |    |     |    |   |       |       |
|----|-------|-------------|------------------|---|-----|------|----|-----|----|---|-------|-------|
| 14 | M, 64 | Prostate Ca | Lt hip           | 6 | -10 | -100 | No | No  | 12 | 9 | 0.803 | 0.325 |
| 15 | F, 58 | Rectal Ca   | Rt<br>pelvis+leg | 6 | -10 | -58  | No | Yes | 14 | 8 | 0.918 | 0.439 |

**Table 1:** Clinical, demographic and imaging parameters of the study population (n=15).

NRS-Numeric Rating Scale; POD-Post-operative day; DWI-Diffusion-weighted imaging; MD-mean diffusivity; FA-fractional anisotropy; a.u.-arbitrary unit.
